# Supplementary material
Source: HighWire-hosted journal article supplement (https://dmd.aspetjournals.org/highwire/filestream/65970/field_highwire_adjunct_files/6/DMD35113_Supplemental_Table_1.pdf)
Supplement: DMD35113_Supplemental_Table_1.pdf [file DMD35113_Supplemental_Table_1.pdf]

A PREDICTIVE LIGAND-BASED BAYESIAN MODEL FOR HUMAN DRUG INDUCED LIVER INJURY

Ekins, Antony J. Williams and Jinghai J. Xu

Drug Metabolism and Disposition

Supplemental Table 1

**Training set**

| <b>Chemical Name</b>              | <b>Formula</b> | <b>PubChem_CID</b> | <b>DILI_Bins_Binary *</b> |
|-----------------------------------|----------------|--------------------|---------------------------|
| 1,2,3,4,5,6-hexachlorocyclohexane | C6H6Cl6        | 727                | 1                         |
| 3-Acetamidophenol (AMAP)          | C8H9NO2        | 12,124             | 0                         |
| Acetaminophen                     | C8H9NO2        | 1,983              | 1                         |
| Acetazolamide                     | C4H6N4O3S2     | 1,986              | 1                         |
| Acetohexamide                     | C15H20N2O4S    | 1,989              | 1                         |
| Acetylcholine Chloride            | C7H16ClNO2     | 187                | 0                         |
| Acitretin                         | C21H26O3       | 5,284,513          | 1                         |
| acivicin                          | C5H7ClN2O3     | 294,641            | 0                         |
| Adenosine                         | C10H13N5O4     | 60,961             | 0                         |
| Albendazole                       | C12H15N3O2S    | 2,082              | 1                         |
| Allopurinol                       | C5H4N4O        | 2,094              | 1                         |
| Alloxan Hydrate                   | C4H4N2O5       | 312,231            | 0                         |
| Amantadine HCl                    | C10H18ClN      | 2,130              | 0                         |
| Amiloride HCl                     | C6H9Cl2N7O     | 16,231             | 0                         |
| Aminobenzoate Potassium           | C7H6KNO2       | 978                | 0                         |
| Aminoglutethimide                 | C13H16N2O2     | 2,145              | 0                         |
| Aminosalicylic Acid               | C7H7NO3        | 4,649              | 1                         |
| amiodarone                        | C25H29I2NO3    | 2,157              | 1                         |
| Amitriptyline HCl                 | C20H24ClN      | 2,160              | 0                         |
| ammonium chloride                 | H4ClN          | 22,985             | 0                         |
| amoxapine                         | C17H16ClN3O    | 2,170              | 0                         |
| Amrinone                          | C10H9N3O       | 3,698              | 1                         |
| Amsacrine HCl                     | C21H20ClN3O3S  | 2,179              | 1                         |
| Ascorbate                         | C6H8O6         | 235                | 0                         |
| Aspirin                           | C9H8O4         | 2,244              | 0                         |
| Astemizole                        | C28H31FN4O     | 2,247              | 0                         |

|                             |                |           |   |
|-----------------------------|----------------|-----------|---|
| Atenolol                    | C14H22N2O3     | 2,249     | 0 |
| atractyloside               | C30H44K2O16S2  | 5,702,200 | 1 |
| Azaserine                   | C5H7N3O4       | 5,284,344 | 1 |
| Azathioprine                | C9H7N7O2S      | 2,265     | 1 |
| Aztreonam (Z-isomer)        | C13H17N5O8S2   | 5,742,832 | 0 |
| Bacitracin                  | C66H103N17O16S | 6,474,109 | 0 |
| Bambuterol                  | C18H29N3O5     | 54,766    | 0 |
| Beclomethasone Dipropionate | C28H37ClO7     | 20,469    | 0 |
| Benazepril                  | C24H28N2O5     | 5,362,124 | 0 |
| Benzbromarone               | C17H12Br2O3    | 2,333     | 1 |
| Bepridil HCl                | C24H35ClN2O    | 2,351     | 1 |
| Betahistine DiHCl           | C8H14Cl2N2     | 2,366     | 1 |
| Betamethasone               | C22H29FO5      | 9,782     | 0 |
| Bezafibrate                 | C19H20ClNO4    | 39,042    | 0 |
| Bicalutamide                | C18H14F4N2O4S  | 56,069    | 1 |
| Biotin                      | C10H16N2O3S    | 171,548   | 0 |
| Brompheniramine Maleate     | C20H23BrN2O4   | 6,834     | 0 |
| Bumetanide                  | C17H20N2O5S    | 2,471     | 1 |
| Bupivacaine                 | C18H31ClN2O2   | 2,474     | 0 |
| Bupropion HCl               | C13H19Cl2NO    | 444       | 0 |
| Busulphan                   | C6H14O6S2      | 2,478     | 1 |
| cadmium chloride            | CdCl2          | 176       | 1 |
| Calcium Pantothenate        | C18H32CaN2O10  | 6,109     | 0 |
| Captopril                   | C9H15NO3S      | 44,093    | 1 |
| carbendazim                 | C9H9N3O2       | 25,429    | 1 |
| Carbenoxolone Disodium      | C34H48Na2O7    | 6,419,769 | 0 |
| Carbidopa                   | C10H14N2O4     | 34,359    | 0 |
| Cefoperazone Dihydrate      | C25H31N9O10S2  | 6,420,003 | 0 |
| Chenodiol                   | C24H40O4       | 10,133    | 1 |
| Chloramphenicol Palmitate   | C27H42Cl2N2O6  | 5,959     | 1 |
| Chlorpheniramine Maleate    | C20H23ClN2O4   | 2,725     | 1 |
| chlorpromazine              | C17H19ClN2S    | 2,726     | 1 |
| Chlortetracycline HCl       | C22H24Cl2N2O8  | 5,280,963 | 1 |
| Chlorzoxazone               | C7H4ClNO2      | 2,733     | 1 |
| Ciclopirox                  | C12H17NO2      | 38,911    | 0 |
| Cimetidine                  | C10H16N6S      | 2,756     | 0 |
| Ciprofibrate                | C13H14Cl2O3    | 2,763     | 1 |
| Ciprofloxacin HCl           | C17H19ClFN3O3  | 2,764     | 1 |

|                        |                 |           |   |
|------------------------|-----------------|-----------|---|
| Flupenthixol           | C23H25F3N2OS    | 5,281,881 | 0 |
| Cisapride              | C23H29ClFN3O4   | 2,769     | 0 |
| citalopram             | C20H21FN2O      | 2,771     | 0 |
| Cladribine             | C10H12ClN5O3    | 20,279    | 0 |
| clinafloxacin          | C17H17ClFN3O3   | 60,063    | 0 |
| Clomiphene Citrate     | C32H36ClNO8     | 3,033,832 | 1 |
| Clomipramine           | C19H23ClN2      | 2,801     | 1 |
| Clonidine HCl          | C9H10Cl3N3      | 2,803     | 1 |
| Clotrimazole           | C22H17ClN2      | 2,812     | 0 |
| Clozapine              | C18H19ClN4      | 2,818     | 1 |
| Colchicine             | C22H25NO6       | 6,167     | 0 |
| Cromolyn               | C23H16O11       | 2,882     | 0 |
| Cyanocobalamin         | C63H88CoN14O14P | 5,460,135 | 0 |
| Cyclophosphamide       | C7H15Cl2N2O2P   | 2,907     | 1 |
| cyclosporin A          | C62H111N11O12   | 5,284,373 | 1 |
| Cyproheptadine HCl     | C21H22ClN       | 2,913     | 1 |
| Cyproterone acetate    | C24H29ClO4      | 5,284,537 | 1 |
| Danazol                | C22H27NO2       | 28,417    | 1 |
| Dantrolene Sodium      | C14H9N4NaO5     | 9,568,637 | 1 |
| Dapsone                | C12H12N2O2S     | 2,955     | 1 |
| Deferoxamine Mesylate  | C26H52N6O11S    | 2,973     | 1 |
| Demeclocycline HCl     | C21H22Cl2N2O8   | 5,281,008 | 1 |
| desipramine            | C18H22N2        | 2,995     | 0 |
| Dexamethasone          | C22H29FO5       | 5,743     | 0 |
| Dextromethorphan HBr   | C18H26BrNO      | 5,360,696 | 0 |
| d-galactosamine        | C6H13NO5        | 24,154    | 1 |
| Didanosine             | C10H12N4O3      | 50,599    | 1 |
| Diethylcarbamazine     | C10H21N3O       | 3,052     | 1 |
| Diflunisal             | C13H8F2O3       | 3,059     | 1 |
| Digoxin                | C41H64O14       | 30,322    | 0 |
| diltiazem HCl          | C22H27ClN2O4S   | 62,920    | 0 |
| Diphenhydramine HCl    | C17H22ClNO      | 3,100     | 0 |
| Disopyramide Phosphate | C21H32N3O5P     | 107,858   | 1 |
| Dobutamine HCl         | C18H24ClNO3     | 36,811    | 0 |
| Donepezil              | C24H29NO3       | 3,152     | 0 |
| Dopamine               | C8H11NO2        | 681       | 0 |
| Doxycycline hyclate    | C46H58Cl2N4O18  | 5,281,011 | 1 |
| Edrophonium Chloride   | C10H16ClNO      | 3,202     | 0 |

|                           |               |           |   |
|---------------------------|---------------|-----------|---|
| Ergocalciferol            | C28H44O       | 5,280,793 | 0 |
| Ergonovine Maleate        | C23H27N3O6    | 6,437,065 | 0 |
| erythromycin              | C37H67NO13    | 12,560    | 0 |
| Erythromycin estolate (1) | C52H97NO18S   | 12,560    | 1 |
| Eserine                   | C15H21N3O2    | 5,983     | 0 |
| estradiol                 | C18H24O2      | 5,991     | 0 |
| estradiol 17b glucuronide | C24H32O8      | 66,424    | 1 |
| Estrone                   | C18H22O2      | 9,919     | 1 |
| Ethinodiol Diacetate      | C24H32O4      | 6,432,306 | 1 |
| Etoposide                 | C29H32O13     | 36,462    | 1 |
| Famotidine                | C8H15N7O2S3   | 3,325     | 0 |
| FCCP                      | C10H5F3N4O    | 3,330     | 1 |
| Felbamate                 | C11H14N2O4    | 3,331     | 1 |
| Fenofibrate               | C20H21ClO4    | 3,339     | 1 |
| Fenoprofen Sodium         | C15H13NaO3    | 3,342     | 1 |
| Fenoterol HBr             | C17H22BrNO4   | 3,343     | 1 |
| Flecainide Acetate        | C19H24F6N2O5  | 41,022    | 1 |
| Floxuridine               | C9H11FN2O5    | 5,790     | 1 |
| Fluconazole               | C13H12F2N6O   | 3,365     | 1 |
| Flucytosine               | C4H4FN3O      | 3,366     | 1 |
| Fludrocortisone Acetate   | C23H31FO6     | 5,875     | 0 |
| Flumazenil                | C15H14FN3O3   | 3,373     | 0 |
| fluoxetine                | C17H18F3NO    | 3,386     | 0 |
| Flurbiprofen              | C15H13FO2     | 3,394     | 1 |
| Flutamide                 | C11H11F3N2O3  | 3,397     | 1 |
| Fluvastatin               | C24H26FNO4    | 5,281,101 | 0 |
| fluvoxamine               | C15H21F3N2O2  | 5,324,346 | 1 |
| Folate                    | C19H17N7O6    | 6,037     | 0 |
| Furazolidone              | C8H7N3O5      | 5,323,714 | 1 |
| Furosemide                | C12H11ClN2O5S | 3,440     | 1 |
| Gabapentin                | C9H17NO2      | 3,446     | 0 |
| Gallamine Triethiodide    | C30H60I3N3O3  | 6,172     | 0 |
| Gallium Nitrate Hydrate   | H2GaN3O10     | 61,635    | 0 |
| gatifloxacin              | C19H22FN3O4   | 5,379     | 0 |
| Gemfibrozil               | C15H22O3      | 3,463     | 1 |
| Glafenine                 | C19H17ClN2O4  | 3,474     | 1 |
| Gliclazide                | C15H21N3O3S   | 3,475     | 0 |
| Glimepiride               | C24H34N4O5S   | 3,476     | 0 |

|                             |                |           |   |
|-----------------------------|----------------|-----------|---|
| Griseofulvin                | C17H17ClO6     | 441,140   | 1 |
| Hycanthone                  | C20H24N2O2S    | 3,634     | 1 |
| Hydrochlorothiazide         | C7H8ClN3O4S2   | 3,639     | 1 |
| Hydrocortisone              | C21H30O5       | 26,133    | 0 |
| Hydroxyurea                 | CH4N2O2        | 3,657     | 1 |
| Idarubicin HCl              | C26H28ClNO9    | 107,865   | 0 |
| Idoxuridine                 | C9H11N2O5      | 5,905     | 1 |
| Imipramine HCl              | C19H25ClN2     | 3,696     | 1 |
| indomethacin                | C19H16ClNO4    | 3,715     | 1 |
| isoniazid                   | C6H7N3O        | 3,767     | 1 |
| Isoproterenol HCl           | C11H18ClNO3    | 3,779     | 0 |
| Isotretinoin                | C20H28O2       | 444,795   | 1 |
| Isoxsuprine HCl             | C18H24ClNO3    | 3,783     | 0 |
| Kanamycin Sulfate           | C18H38N4O15S   | 441,374   | 0 |
| Ketorolac Tromethamine      | C19H24N2O6     | 3,826     | 1 |
| Ketotifen                   | C19H19NOS      | 3,827     | 0 |
| Labetalol                   | C19H24N2O3     | 3,869     | 1 |
| Lamivudine                  | C8H11N3O3S     | 60,825    | 0 |
| L-arginine                  | C6H14N4O2      | 6,322     | 0 |
| Leflunomide                 | C12H9F3N2O2    | 3,899     | 1 |
| L-Ethionine                 | C6H13NO2S      | 25,674    | 1 |
| Levodopa                    | C9H11NO4       | 6,047     | 0 |
| levofloxacin                | C18H20FN3O4    | 149,096   | 0 |
| Lidocaine                   | C14H22N2O      | 3,676     | 0 |
| Lisinopril                  | C21H31N3O5     | 5,362,119 | 1 |
| Lithocholic acid            | C24H40O3       | 9,903     | 1 |
| Lomefloxacin HCl            | C17H20ClF2N3O3 | 3,948     | 1 |
| Loperamide HCl              | C29H34Cl2N2O2  | 3,955     | 0 |
| Lovastatin                  | C24H36O5       | 53,232    | 0 |
| maleic acid                 | C4H4O4         | 21,954    | 1 |
| Maprotiline                 | C20H23N        | 4,011     | 0 |
| Mebendazole                 | C16H13N3O3     | 4,030     | 1 |
| Meclofenamate Sodium        | C14H12Cl2NNaO3 | 4,037     | 1 |
| Medroxyprogesterone Acetate | C24H34O4       | 5,702,080 | 0 |
| Mefenamic Acid              | C15H15NO2      | 4,044     | 1 |
| Melatonin                   | C13H16N2O2     | 896       | 0 |
| Memantine                   | C12H21N        | 4,054     | 0 |
| Mercaptopurine              | C5H4N4S        | 667,490   | 1 |

|                          |               |            |   |
|--------------------------|---------------|------------|---|
| Mesoridazine Besylate    | C27H32N2O4S3  | 4,078      | 1 |
| Metaproterenol Sulfate   | C22H36N2O10S  | 4,086      | 1 |
| Methacycline HCl         | C22H23ClN2O8  | 5,281,092  | 1 |
| Methicillin Sodium       | C17H19N2NaO6S | 23,689,098 | 1 |
| Methimazole              | C4H6N2S       | 1,349,907  | 1 |
| Methotrexate             | C20H22N8O5    | 126,941    | 1 |
| Methoxamine HCl          | C11H18ClNO3   | 6,082      | 0 |
| Methylergonovine Maleate | C24H29N3O6    | 8,226      | 0 |
| Methysergide Maleate     | C21H27N3O2    | 9,681      | 0 |
| Metoclopramide HCl       | C14H23Cl2N3O2 | 4,168      | 1 |
| Metronidazole            | C6H9N3O3      | 4,173      | 1 |
| Mexiletine HCl           | C11H18ClNO    | 21,467     | 1 |
| Miconazole               | C18H14Cl4N2O  | 4,189      | 0 |
| Mitoxantrone diHCl       | C22H30Cl2N4O6 | 4,212      | 1 |
| Molindone HCl            | C16H25ClN2O2  | 23,897     | 1 |
| Monocrotaline            | C16H23NO6     | 104,764    | 1 |
| montelukast              | C35H36ClNO3S  | 5,281,040  | 0 |
| Nadolol                  | C17H27NO4     | 39,147     | 0 |
| Nalidixic Acid           | C12H12N2O3    | 4,421      | 1 |
| Nalmefene                | C21H25NO3     | 5,284,594  | 0 |
| Naltrexone               | C20H23NO4     | 5,360,515  | 1 |
| Niacin                   | C6H5NO2       | 938        | 1 |
| Nicardipine HCl          | C26H30ClN3O6  | 4,474      | 1 |
| Nifedipine               | C17H18N2O6    | 4,485      | 1 |
| Nimesulide               | C13H12N2O5S   | 4,495      | 1 |
| Nimodipine               | C21H26N2O7    | 4,497      | 1 |
| Nisoldipine              | C20H24N2O6    | 4,499      | 0 |
| Nocodazole               | C14H11N3O3S   | 4,122      | 0 |
| nomifensine              | C16H18N2      | 4,528      | 1 |
| Norethindrone            | C20H26O2      | 6,230      | 1 |
| Norgestrel               | C21H28O2      | 5,991      | 1 |
| Nortriptyline HCl        | C19H22ClN     | 4,543      | 1 |
| Novobiocin               | C31H36N2O11   | 4,546      | 1 |
| Orphenadrine Citrate     | C24H31NO8     | 4,601      | 0 |
| oxybendazole             | C12H15N3O3    | 4,622      | 1 |
| Oxybutynin HCl           | C22H32ClNO3   | 4,634      | 0 |
| Oxyphenonium             | C21H34NO3     | 5,749      | 0 |
| Pamidronate              | C3H9NNa2O7P2  | 73,351     | 0 |

|                         |               |           |   |
|-------------------------|---------------|-----------|---|
| Paromomycin Sulfate     | C23H47N5O18S  | 165,580   | 0 |
| Paroxetine              | C19H20FNO3    | 43,815    | 0 |
| p-bromophenol           | C6H5BrO       | 7,808     | 1 |
| Penicillin G Sodium     | C16H17N2NaO4S | 2,349     | 1 |
| Perhexilene             | C19H35N       | 4,746     | 1 |
| Phenacetin              | C10H13NO2     | 4,754     | 1 |
| Phenazopyridine HCl     | C11H12ClN5    | 4,756     | 1 |
| phenelzine              | C8H12N2       | 61,100    | 0 |
| Phenoxybenzamine HCl    | C18H23Cl2NO   | 4,768     | 0 |
| Phentolamine Mesylate   | C18H23N3O4S   | 91,430    | 1 |
| Phenylbutazone          | C19H20N2O2    | 4,781     | 1 |
| Phenylpropanolamine HCl | C9H14ClNO     | 26,934    | 0 |
| phenytoin               | C15H12N2O2    | 1,775     | 1 |
| Pilocarpine             | C11H16N2O2    | 5,910     | 0 |
| Pinacidil               | C13H21N5O     | 4,826     | 0 |
| Pindolol                | C14H20N2O2    | 4,828     | 0 |
| Piroxicam               | C15H13N3O4S   | 5,280,452 | 1 |
| potassium dichromate    | Cr2K2O7       | 8,232     | 1 |
| Praziquantel            | C19H24N2O2    | 4,891     | 0 |
| Prednisone              | C21H26O5      | 5,865     | 0 |
| Primaquine Phosphate    | C15H27N3O9P2  | 4,908     | 0 |
| Primidone               | C12H14N2O2    | 4,909     | 0 |
| Procarbazine HCl        | C12H20ClN3O   | 4,915     | 1 |
| Progesterone            | C21H30O2      | 12,419    | 1 |
| Promazine HCl           | C17H21ClN2S   | 4,926     | 0 |
| Promethazine HCl        | C17H21ClN2S   | 4,927     | 0 |
| Propafenone HCl         | C21H28ClNO3   | 4,932     | 0 |
| Pseudoephedrine HCl     | C10H16ClNO    | 7,028     | 0 |
| puromycin               | C22H29N7O5    | 4,984     | 1 |
| Pyrazinamide            | C5H5N3O       | 1,046     | 1 |
| Pyridostigmine Bromide  | C9H13BrN2O2   | 4,991     | 0 |
| Pyridoxine              | C8H11NO3      | 1,054     | 0 |
| Pyrimethamine           | C12H13ClN4    | 4,993     | 1 |
| Quinapril               | C25H30N2O5    | 54,892    | 1 |
| quinidine               | C20H24N2O2    | 11,069    | 1 |
| quinine                 | C20H24N2O2    | 8,549     | 1 |
| raloxifene              | C28H27NO4S    | 5,035     | 0 |
| ranitidine              | C13H22N4O3S   | 3,001,055 | 0 |

|                      |                |           |   |
|----------------------|----------------|-----------|---|
| Retinoic Acid        | C20H28O2       | 444,795   | 1 |
| Ribavirin            | C8H12N4O5      | 37,542    | 0 |
| Riluzole             | C8H5F3N2OS     | 5,070     | 1 |
| Risperidone          | C23H27FN4O2    | 5,073     | 1 |
| Sertraline           | C17H17Cl2N     | 68,617    | 0 |
| Simvastatin          | C25H38O5       | 54,454    | 0 |
| Sorbitol             | C6H12O6        | 5,780     | 0 |
| Spironolactone       | C24H32O4S      | 5,833     | 1 |
| Stavudine            | C10H12N2O4     | 18,283    | 1 |
| Streptomycin Sulfate | C21H41N7O16S   | 19,649    | 0 |
| Sulfasalazine        | C18H14N4O5S    | 5,353,980 | 1 |
| Sulindac             | C20H17FO3S     | 1,548,887 | 1 |
| Sumatriptan          | C14H21N3O2S    | 5,358     | 0 |
| tacrine              | C13H14N2       | 1,935     | 0 |
| tamoxifen            | C26H29NO       | 2,733,526 | 1 |
| telmisartan          | C33H30N4O2     | 65,999    | 0 |
| Temozolomide         | C6H6N6O2       | 5,394     | 0 |
| terfenadine          | C32H41NO2      | 5,405     | 0 |
| Tetracaine HCl       | C15H25ClN2O2   | 8,695     | 0 |
| tetracycline         | C22H24N2O8     | 5,497,101 | 1 |
| thioacetamide        | C2H5NS         | 2,723,949 | 1 |
| Thioguanine          | C5H5N5S        | 2,723,601 | 1 |
| Thiothixene          | C23H29N3O2S2   | 941,651   | 0 |
| tianeptine           | C21H25ClN2O4S  | 68,870    | 1 |
| Ticlopidine          | C14H14ClNS     | 5,472     | 1 |
| Timolol Maleate      | C17H28N4O7S    | 5,478     | 1 |
| Tolmetin             | C15H15NO3      | 5,509     | 1 |
| Tranylcypromine HCl  | C9H12ClN       | 19,493    | 0 |
| Trazodone HCl        | C19H23Cl2N5O   | 5,533     | 1 |
| trifluoperazine      | C21H24F3N3S    | 5,566     | 1 |
| Trimethadione        | C6H9NO3        | 5,576     | 1 |
| Trovafloxacin        | C20H15F3N4O3   | 483,952   | 1 |
| Ursodeoxycholic acid | C24H40O4       | 31,401    | 0 |
| Vancomycin           | C66H75Cl2N9O24 | 444,193   | 1 |
| Vidarabine           | C10H15N5O5     | 21,704    | 0 |
| Warfarin             | C19H16O4       | 6,691     | 0 |
| Zafirlukast          | C31H33N3O6S    | 5,717     | 1 |
| Zalcitabine          | C9H13N3O3      | 24,066    | 0 |



|            |             |        |   |
|------------|-------------|--------|---|
| Zidovudine | C10H13N5O4  | 35,370 | 1 |
| Zileuton   | C11H12N2O2S | 60,490 | 1 |
| Zomepirac  | C15H14ClNO3 | 5,733  | 0 |

#### Test set

| Chemical Name                    | Formula        | PubChem_CID | DILI_Bins_Binary * |
|----------------------------------|----------------|-------------|--------------------|
| sudoxicam                        | C13H11N3O4S2   |             | 1                  |
| meloxicam                        | C14H13N3O4S2   |             | 0                  |
| olmesartan                       | C29H30N6O6     |             | 0                  |
| celecoxib                        | C17H14F3N3O2S  |             | 1                  |
| lapatinib                        | C29H26ClFN4O4S |             | 1                  |
| gefitinib                        | C22H24ClFN4O3  |             | 1                  |
| 6-mercaptopurine                 | C5H4N4S        |             | 1                  |
| Abacavir                         | C14H18N6O      |             | 1                  |
| Acenocoumarol                    | C19H15NO6      |             | 1                  |
| Acetylcysteine                   | C5H9NO3S       |             | 0                  |
| Aclarubicin HCl                  | C42H54ClNO15   |             | 0                  |
| adriamycin                       | C27H30ClNO11   |             | 0                  |
| aflatoxin B1                     | C17H12O6       |             | 1                  |
| Allyl alcohol                    | C3H6O          |             | 1                  |
| allyl formate                    | C4H6O2         |             | 1                  |
| alpidem                          | C21H23Cl2N3O   |             | 1                  |
| Amineptine HCl                   | C22H28ClNO2    |             | 1                  |
| Aminocaproic Acid                | C6H13NO2       |             | 0                  |
| Amodiaquine HCl                  | C20H23Cl2N3O   |             | 1                  |
| Amoxicillin                      | C16H19N3O5S    |             | 0                  |
| Amphotericin B                   | C47H73NO17     |             | 0                  |
| Ampicillin Sodium                | C16H18N3NaO4S  |             | 0                  |
| Anileridine HCl                  | C22H29ClN2O2   |             | 0                  |
| ANIT (1-Naphthyl isothiocyanate) | C11H7NS        |             | 1                  |
| Arsenic Trioxide                 | As2O3          |             | 1                  |
| atomoxetine                      | C17H21NO       |             | 1                  |
| Auranofin                        | C19H32AuO9PS   |             | 1                  |
| Aurothioglucose                  | C6H11AuO5S     |             | 1                  |
| aurothiolamate                   | C4H3AuNa2O4S   |             | 1                  |
| Azacytidine                      | C8H12N4O5      |             | 1                  |
| Azatadine Maleate                | C24H26N2O4     |             | 1                  |
| Azlocillin Sodium                | C20H22N5NaO6S  |             | 0                  |

|                                  |                |   |
|----------------------------------|----------------|---|
| BEA (bromoethanamine)            | C2H6BrN        | 1 |
| benoxaprofen                     | C16H12ClNO3    | 1 |
| Betaine HCl                      | C5H12ClNO2     | 0 |
| Bismuth Subsalicylate            | C7H5BiO4       | 0 |
| Bithionol                        | C12H6Cl4O2S    | 1 |
| BNIT (2-Naphthyl isothiocyanate) | C11H7NS        | 0 |
| Bosentan                         | C27H29N5O6S    | 1 |
| bromfenac                        | C15H12BrNO3    | 1 |
| Bromobenzene                     | C6H5Br         | 1 |
| buthioninesulphoxime             | C20H10Br4O10S2 | 1 |
| Butoconazole Nitrate             | C19H18Cl3N3O3S | 0 |
| Butylated hydroxytoluene         | C15H24O        | 1 |
| Caffeine                         | C8H10N4O2      | 0 |
| Calcifediol                      | C27H44O2       | 1 |
| candesartan                      | C24H20N6O3     | 0 |
| Capsaicin                        | C18H27NO3      | 0 |
| carbamzepine                     | C15H12N2O      | 1 |
| carbon tetrachloride (2)         | CCl4           | 1 |
| Carboplatin                      | C6H12N2O4Pt    | 1 |
| Cefadroxil                       | C16H19N3O6S    | 1 |
| Cefamandole Sodium               | C18H17N6NaO5S2 | 1 |
| Cefotetan                        | C17H17N7O8S4   | 0 |
| Cefotiam HCl                     | C18H24ClN9O4S3 | 1 |
| Cefoxitin                        | C16H17N3O7S2   | 1 |
| Ceftazidime                      | C22H22N6O7S2   | 0 |
| Ceftriaxone Sodium E-Isomer      | C18H17N8NaO7S3 | 1 |
| cephaloridine                    | C19H17N3O4S2   | 1 |
| Cephalothin Sodium               | C16H15N2NaO6S2 | 1 |
| Cephapirin Sodium                | C17H16N3NaO6S2 | 0 |
| Cephradine                       | C16H19N3O4S    | 0 |
| cerivastatin                     | C26H34FNO5     | 1 |
| Chloroform                       | CHCl3          | 1 |
| Chloroquine Phosphate            | C18H32ClN3O8P2 | 0 |
| Chlorpropamide                   | C10H13ClN2O3S  | 1 |
| Ciglitizone                      | C18H23NO3S     | 1 |
| Cinchophen                       | C16H11NO2      | 1 |
| cisplatin                        | H6Cl2N2Pt      | 1 |
| Citicoline                       | C12H22N4O11P2  | 0 |

|                                         |                  |   |
|-----------------------------------------|------------------|---|
| Clarithromycin                          | C38H69NO13       | 1 |
| Clemastine Fumarate                     | C25H30ClNO5      | 0 |
| Clindamycin HCl                         | C18H34Cl2N2O5S   | 1 |
| Clofibrate                              | C12H15ClO3       | 1 |
| Cloxacillin Sodium                      | C19H19ClN3NaO6S  | 1 |
| Cyclizine                               | C18H22N2         | 1 |
| Dacarbazine                             | C6H10N6O         | 1 |
| Dactinomycin                            | C62H86N12O16     | 1 |
| DCB (dichlorobenzene)                   | C6H4Cl2          | 1 |
| Dextroamphetamine Sulfate               | C18H28N2O4S      | 1 |
| dichloroethylene                        | C2H4Cl2          | 1 |
| dichlorophenyl succinimide              | C9H10Cl2N2O      | 1 |
| Dicloxacillin Sodium                    | C19H16Cl2N3NaO5S | 1 |
| Diethylhexylphthalate (phthalate ester) | C24H38O4         | 1 |
| difluoropentane                         | C5H10F2          | 1 |
| Dimercaprol                             | C3H8OS2          | 1 |
| dimethylnitrosamine                     | C2H6N2O          | 1 |
| dinitrophenol                           | C6H4N2O5         | 1 |
| Di-n-pentyl-phthalate                   | C18H26O4         | 1 |
| Diphenoxylate HCl                       | C30H33ClN2O2     | 0 |
| Dipyridamole                            | C24H40N8O4       | 0 |
| Diquat                                  | C12H12Br2N2      | 1 |
| Divalproex Sodium                       | C16H31NaO4       | 1 |
| d-limonene                              | C10H16           | 1 |
| Doxorubicin HCl                         | C27H30ClNO11     | 1 |
| Econazole Nitrate                       | C18H16Cl3N3O4    | 0 |
| entacapone                              | C14H15N3O5       | 0 |
| Epirubicin                              | C27H29NO11       | 0 |
| eprosartan                              | C23H24N2O4S      | 0 |
| Ergotamine I-Tartrate                   | C37H41N5O11      | 0 |
| Ethane Dimethane Sulfonate              | C14H10Cl4        | 1 |
| ethinyl estradiol                       | C20H24O2         | 1 |
| Ethosuximide                            | C7H11NO2         | 1 |
| ethylene glycol                         | C2H6O2           | 1 |
| Fexofenadine                            | C32H39NO4        | 0 |
| Fialuridine                             | C9H10FIN2O5      | 1 |
| Fipexide                                | C20H21ClN2O4     | 1 |
| Flufenamic Acid (Flufenamate)           | C14H10F3NO2      | 0 |

|                      |               |   |
|----------------------|---------------|---|
| flunoxapfen          | C16H12FNO3    | 0 |
| Fluorouracil         | C4H3FN2O2     | 1 |
| Fluspirilene         | C29H31F2N3O   | 1 |
| Foscarnet            | CH3O5P        | 0 |
| Glutethimide         | C13H15NO2     | 1 |
| grepafloxacin        | C19H22FN3O3   | 1 |
| Guanethidine Sulfate | C10H24N4O4S   | 1 |
| Hexachlorophene      | C13H6Cl6O2    | 1 |
| Hydrazine            | H4N2          | 1 |
| Hyoscyamine Sulfate  | C17H25NO7S    | 1 |
| Ibufenac             | C12H16O2      | 1 |
| Ibuprofen            | C13H18O2      | 0 |
| Ifosfamide           | C7H15Cl2N2O2P | 1 |
| indacrinone          | C18H14Cl2O4   | 1 |
| indinavir sulphate   | C36H49N5O8S   | 0 |
| Iopamidol            | C17H22I3N3O8  | 1 |
| iproniazid           | C9H13N3O      | 1 |
| irbesartan           | C25H28N6O     | 0 |
| Isocarboxazid        | C12H13N3O2    | 0 |
| Isosorbide dinitrate | C6H8N2O8      | 0 |
| Isoxicam             | C14H13N3O5S   | 0 |
| Ketoconazole         | C26H28Cl2N4O4 | 1 |
| ketoprofen           | C16H14O3      | 0 |
| Lactose              | C12H22O11     | 0 |
| Leucovorin Calcium   | C20H21CaN7O7  | 0 |
| Liothyronine         | C15H12I3NO4   | 0 |
| Loracarbef           | C16H18ClN3O5  | 0 |
| losartan             | C22H23ClN6O   | 1 |
| Lumiracoxib          | C15H13ClFNO2  | 1 |
| Menadione            | C11H8O2       | 1 |
| Mephobarbital        | C13H14N2O3    | 1 |
| Meproamate           | C9H18N2O4     | 1 |
| Mestranol            | C21H26O2      | 1 |
| Metformin            | C4H11N5       | 0 |
| Methapyrilene        | C14H19N3S     | 1 |
| Methapyrilene        | C14H19N3S     | 1 |
| Methoxyacetic Acid   | C3H6O3        | 1 |
| Methyldopa           | C10H13NO4     | 1 |

|                          |                |   |
|--------------------------|----------------|---|
| methylene dianiline      | C16H18ClN3S    | 1 |
| Methylphenidate          | C14H19NO2      | 1 |
| Metolazone               | C16H16ClN3O3S  | 1 |
| Mezlocillin Sodium       | C21H24N5NaO8S2 | 1 |
| mianserin                | C18H20N2       | 1 |
| Mibefradil               | C29H38FN3O3    | 0 |
| Microcystin-LR           | C49H74N10O12   | 1 |
| Minocycline HCl          | C23H28ClN3O7   | 1 |
| Mometasone Furoate       | C27H30Cl2O6    | 0 |
| Moricizine HCl           | C22H26ClN3O4S  | 1 |
| Moxalactam Disodium      | C20H18N6Na2O9S | 0 |
| Myo-inositol             | C6H12O6        | 0 |
| N-acetyl cysteine        | C5H9NO3S       | 0 |
| Nafcillin Sodium         | C21H21N2NaO5S  | 0 |
| naproxen                 | C14H14O3       | 0 |
| Nitrofurantoin           | C8H6N4O5       | 1 |
| o-bromophenol            | C6H5BrO        | 1 |
| Octyl Methoxycinnamate   | C18H26O3       | 1 |
| Oxaprozin                | C18H15NO3      | 1 |
| Oxyquinoline Sulfate     | C9H9NO5S       | 1 |
| Paclitaxel               | C47H51NO14     | 1 |
| PAP (para-aminophenol)   | C18H24NO5PS2   | 0 |
| paraquat                 | C14H20N2O8S2   | 1 |
| Pargyline                | C11H13N        | 0 |
| pemoline                 | C9H8N2O2       | 1 |
| Penbutolol Sulfate       | C36H60N2O8S    | 1 |
| Pentanoic Acid           | C5H10O2        | 0 |
| Permethrin               | C21H20Cl2O3    | 0 |
| phenothiazine            | C12H9NS        | 1 |
| phenyl isothiocyanate    | C7H5NS         | 1 |
| Pimozide                 | C28H29F2N3O    | 0 |
| Pirprofen                | C13H14ClNO2    | 1 |
| probenecid               | C13H19NO4S     | 0 |
| Probucol                 | C31H48O2S2     | 0 |
| Prochlorperazine Maleate | C28H32ClN3O8S  | 1 |
| Propofol                 | C12H18O        | 0 |
| Quinine Sulfate          | C40H50N4O8S    | 1 |
| ragaglitazar             | C25H25NO5      | 0 |

|                                  |                |   |
|----------------------------------|----------------|---|
| Retinyl palmitate                | C36H58O3       | 1 |
| Rifabutin                        | C46H62N4O11    | 1 |
| Rifampicin                       | C43H58N4O12    | 0 |
| ritonavir                        | C37H48N6O5S2   | 1 |
| rotenone                         | C23H22O6       | 1 |
| Saquinavir base / mesylate       | C38H50N6O5     | 1 |
| Spectinomycin HCl                | C14H25ClN2O7   | 1 |
| Streptomycin                     | C21H39N7O12    | 0 |
| Streptozocin                     | C8H15N3O7      | 0 |
| Sulconazole Nitrate              | C18H16Cl3N3O3S | 0 |
| Sulfabenzamide                   | C13H12N2O3S    | 0 |
| Sulfamethizole                   | C9H10N4O2S2    | 1 |
| Sulfanilamide                    | C6H8N2O2S      | 1 |
| Sulfapyrazone                    | C23H20N2O3S    | 1 |
| Tasosartan                       | C23H21N7O      | 1 |
| telenzepine                      | C19H22N4O2S    | 0 |
| Temafloxacin                     | C21H18F3N3O3   | 1 |
| Terbutaline Sulfate              | C24H40N2O10S   | 1 |
| Tetraethylthiuran                | C10H20N2S4     | 0 |
| Theophylline                     | C7H8N4O2       | 0 |
| Thiamine                         | C12H17ClN4OS   | 0 |
| ticrynafen                       | C13H8Cl2O4S    | 1 |
| Tobramycin                       | C18H37N5O9     | 1 |
| Tolazamide                       | C14H21N3O3S    | 1 |
| Tolbutamide                      | C12H18N2O3S    | 1 |
| tolcapone                        | C14H11NO5      | 1 |
| Tolrestat                        | C16H14F3NO3S   | 1 |
| Topiramate                       | C12H21NO8S     | 0 |
| trichloroethylene                | C2HCl3         | 1 |
| Trientine HCl                    | C6H19ClN4      | 1 |
| Trimethobenzamide HCl            | C21H29ClN2O5   | 1 |
| Trimethoprim                     | C14H18N4O3     | 1 |
| Tripelennamine HCl               | C16H22ClN3     | 1 |
| Troleandomycin                   | C41H67NO15     | 1 |
| Tromethamine                     | C4H11NO3       | 0 |
| TUDC (tauroursodeoxycholic acid) | C26H45NO5S     | 1 |
| Uracil Mustard                   | C8H11Cl2N3O2   | 1 |
| Valproic Acid                    | C8H16O2        | 1 |

|                     |              |           |   |
|---------------------|--------------|-----------|---|
| Verapamil HCl       | C27H39ClN2O4 |           | 0 |
| Vinblastine Sulfate | C46H60N4O13S |           | 0 |
| Vincristine Sulfate | C46H58N4O14S |           | 1 |
| Ximelagatran        | C24H35N5O5   |           | 1 |
| zolpidem            | C19H21N3O    |           | 0 |
| Azithromycin        | C38H72N2O12  | 447,043   | 0 |
| buspirone           | C21H31N5O2   | 2,477     | 0 |
| diclofenac          | C14H11Cl2NO2 | 3,033     | 1 |
| Nefazodone          | C25H32ClN5O2 | 4,449     | 1 |
| Pioglitazone        | C19H20N2O3S  | 4,829     | 0 |
| Propranolol         | C16H21NO2    | 4,946     | 0 |
| Rosiglitazone       | C18H19N3O3S  | 77,999    | 0 |
| telithromycin       | C43H65N5O10  | 3,002,190 | 1 |
| trogliatzone        | C24H27NO5S   | 5,591     | 1 |
| valsartan           | C24H29N5O3   | 60,846    | 0 |
